# Supplementary material for: Performance of the Two-Source Energy Balance (TSEB) Model as a Tool for Monitoring the Response of Durum Wheat to Drought by High-Throughput Field Phenotyping
Source: Front Plant Sci. 2021 Apr 16;12:658357. doi: 10.3389/fpls.2021.658357 (PMC8085348; doi:10.3389/fpls.2021.658357)
Supplement: Supplementary file 1 [file Table_1.pdf]

Supplementary Table 1. Genotype means across replications for the assessed traits. Traits estimated through remote sensing: ET<sub>a</sub>, actual evapotranspiration; T, actual transpiration; H, plant height; MTVI<sub>2</sub>, LAI surrogate. Numbers after each trait indicate the image acquisition event: 1, April 4<sup>th</sup> (jointing); 2, April 30<sup>th</sup> (anthesis); 3, May 22<sup>nd</sup> (grain filling). Measured traits at ground level: DH, days to heading; DA, days to anthesis; DM, days to maturity; GFD, grain filling duration; PH, plant height; NSm<sup>2</sup>, number of spikes/m<sup>2</sup>; NGS, number of grains/spike; TKW, thousand kernel weight; GFR, grain filling rate.

| Genotpe                     | Irrigation treatment 100%Etc |       |       |                   |       |       |       |                   |       |       |       |                   |     |     |     |     |       |     |      |      |       |      |  |
|-----------------------------|------------------------------|-------|-------|-------------------|-------|-------|-------|-------------------|-------|-------|-------|-------------------|-----|-----|-----|-----|-------|-----|------|------|-------|------|--|
|                             | ETa1                         | T1    | H1    | MTVI <sub>1</sub> | ETa2  | T2    | H2    | MTVI <sub>1</sub> | ETa3  | T3    | H3    | MTVI <sub>1</sub> | DH  | DA  | DM  | GFD | Yield | PH  | Nsm2 | NGS  | TKW   | GFR  |  |
| 05D278D1be                  | 4.739                        | 2.339 | 0.380 | 1.608             | 6.531 | 4.241 | 0.815 | 3.941             | 6.848 | 4.926 | 0.878 | 4.095             | 131 | 138 | 181 | 43  | 7816  | 95  | 369  | 41.3 | 57.27 | 1.33 |  |
| 07D057D4fba                 | 4.946                        | 2.576 | 0.354 | 1.476             | 6.894 | 4.405 | 0.721 | 3.935             | 7.320 | 5.523 | 0.834 | 3.986             | 137 | 145 | 185 | 40  | 9942  | 95  | 440  | 39.3 | 60.70 | 1.52 |  |
| 08D010D10cab                | 4.868                        | 2.458 | 0.413 | 1.574             | 6.909 | 4.436 | 0.724 | 4.569             | 7.125 | 5.548 | 0.895 | 4.770             | 136 | 143 | 182 | 39  | 9390  | 92  | 707  | 37.7 | 50.73 | 1.30 |  |
| 09D066D8cab                 | 4.984                        | 2.416 | 0.369 | 1.680             | 6.799 | 4.306 | 0.747 | 4.514             | 7.376 | 5.474 | 0.890 | 4.908             | 138 | 146 | 185 | 39  | 9210  | 97  | 533  | 38.6 | 59.20 | 1.53 |  |
| 09D069D1dcf                 | 4.716                        | 2.389 | 0.409 | 1.691             | 6.810 | 4.502 | 0.775 | 4.537             | 6.697 | 5.249 | 0.888 | 4.012             | 136 | 144 | 184 | 40  | 9087  | 92  | 542  | 37.5 | 59.20 | 1.49 |  |
| ANVERGUR                    | 4.681                        | 2.267 | 0.308 | 1.565             | 6.863 | 4.407 | 0.757 | 4.592             | 7.446 | 5.736 | 0.856 | 4.950             | 138 | 147 | 186 | 39  | 10008 | 92  | 436  | 50.1 | 53.57 | 1.36 |  |
| ATHORIS                     | 4.833                        | 2.556 | 0.349 | 1.998             | 6.776 | 4.547 | 0.724 | 4.682             | 7.259 | 5.612 | 0.779 | 4.521             | 132 | 139 | 181 | 43  | 9449  | 83  | 480  | 43.3 | 53.17 | 1.25 |  |
| BURGOS                      | 4.825                        | 2.449 | 0.407 | 1.501             | 6.852 | 4.609 | 0.712 | 4.676             | 7.459 | 5.918 | 0.882 | 4.911             | 138 | 147 | 184 | 37  | 9750  | 100 | 653  | 37.2 | 60.73 | 1.63 |  |
| CALERO                      | 4.705                        | 2.273 | 0.376 | 1.518             | 6.597 | 4.611 | 0.617 | 3.978             | 6.479 | 4.871 | 0.703 | 2.643             | 137 | 143 | 185 | 42  | 8102  | 82  | 289  | 60.3 | 45.47 | 1.08 |  |
| CARPIO                      | 4.671                        | 2.414 | 0.324 | 1.615             | 6.798 | 4.458 | 0.757 | 4.080             | 7.284 | 5.602 | 0.838 | 4.163             | 134 | 141 | 182 | 41  | 9194  | 93  | 453  | 51.5 | 53.23 | 1.30 |  |
| CLAUDIO                     | 5.117                        | 2.676 | 0.427 | 2.487             | 6.884 | 4.461 | 0.819 | 5.101             | 7.407 | 5.603 | 0.899 | 5.014             | 136 | 144 | 184 | 40  | 9515  | 98  | 524  | 40.2 | 55.43 | 1.40 |  |
| DON_RICARDO                 | 4.859                        | 2.544 | 0.419 | 2.137             | 6.746 | 4.506 | 0.842 | 4.505             | 7.162 | 5.481 | 0.928 | 4.317             | 135 | 143 | 181 | 38  | 9022  | 102 | 453  | 42.0 | 62.37 | 1.64 |  |
| DON_SEBASTIAN               | 5.053                        | 2.404 | 0.387 | 1.537             | 6.932 | 4.402 | 0.793 | 4.996             | 7.161 | 5.584 | 0.940 | 4.846             | 136 | 146 | 184 | 39  | 8830  | 100 | 498  | 34.3 | 63.17 | 1.63 |  |
| EUNOBLE                     | 5.008                        | 2.558 | 0.355 | 1.749             | 6.744 | 4.385 | 0.764 | 4.242             | 6.955 | 5.237 | 0.900 | 4.183             | 130 | 138 | 180 | 43  | 8307  | 88  | 471  | 41.4 | 51.13 | 1.20 |  |
| EURODURO                    | 5.225                        | 2.678 | 0.390 | 2.083             | 6.933 | 4.394 | 0.772 | 4.400             | 7.450 | 5.630 | 0.920 | 4.564             | 135 | 144 | 183 | 38  | 10446 | 95  | 742  | 37.4 | 55.17 | 1.44 |  |
| GRADOR                      | 5.060                        | 2.501 | 0.412 | 1.980             | 6.843 | 4.324 | 0.817 | 4.297             | 7.349 | 5.445 | 0.905 | 4.208             | 134 | 142 | 182 | 40  | 9981  | 93  | 338  | 36.7 | 64.80 | 1.61 |  |
| IBERUS                      | 4.872                        | 2.492 | 0.389 | 2.152             | 6.907 | 4.553 | 0.741 | 5.271             | 7.465 | 5.953 | 0.809 | 5.410             | 138 | 145 | 185 | 40  | 8971  | 90  | 538  | 39.1 | 50.37 | 1.25 |  |
| SCULPTUR                    | 4.985                        | 2.405 | 0.399 | 1.556             | 6.756 | 4.503 | 0.684 | 4.642             | 7.062 | 5.553 | 0.832 | 4.697             | 135 | 142 | 183 | 41  | 9161  | 85  | 516  | 52.0 | 49.30 | 1.20 |  |
| TUSSUR                      | 4.617                        | 2.225 | 0.340 | 1.463             | 6.537 | 4.407 | 0.676 | 3.735             | 6.457 | 4.914 | 0.794 | 2.484             | 132 | 139 | 182 | 43  | 7274  | 80  | 529  | 40.3 | 55.07 | 1.28 |  |
| Irrigation treatment 50%Etc |                              |       |       |                   |       |       |       |                   |       |       |       |                   |     |     |     |     |       |     |      |      |       |      |  |
| 05D278D1be                  | 5.407                        | 2.465 | 0.391 | 2.054             | 6.211 | 4.316 | 0.753 | 3.260             | 5.184 | 4.136 | 0.979 | 2.949             | 127 | 135 | 175 | 40  | 7011  | 90  | 462  | 34.1 | 55.77 | 1.38 |  |
| 07D057D4fba                 | 5.415                        | 2.504 | 0.384 | 2.225             | 6.372 | 4.534 | 0.786 | 3.989             | 5.747 | 4.652 | 0.914 | 3.961             | 133 | 140 | 177 | 37  | 7792  | 87  | 400  | 34.3 | 55.77 | 1.49 |  |
| 08D010D10cab                | 5.471                        | 2.680 | 0.347 | 2.317             | 6.230 | 4.467 | 0.748 | 3.694             | 5.332 | 4.594 | 0.899 | 3.634             | 131 | 138 | 175 | 37  | 7594  | 90  | 564  | 30.2 | 51.13 | 1.37 |  |
| 09D066D8cab                 | 5.483                        | 2.453 | 0.406 | 2.327             | 6.393 | 4.396 | 0.714 | 3.767             | 5.604 | 4.627 | 1.019 | 3.314             | 135 | 143 | 178 | 35  | 7896  | 90  | 556  | 32.9 | 56.17 | 1.62 |  |
| 09D069D1dcf                 | 5.465                        | 2.572 | 0.388 | 2.249             | 6.413 | 4.580 | 0.753 | 3.923             | 5.447 | 4.954 | 0.864 | 3.376             | 132 | 139 | 176 | 37  | 7588  | 87  | 609  | 34.9 | 53.47 | 1.45 |  |
| ANVERGUR                    | 5.258                        | 2.577 | 0.314 | 2.177             | 6.399 | 4.553 | 0.742 | 4.284             | 5.196 | 4.495 | 0.864 | 3.292             | 135 | 142 | 178 | 36  | 7863  | 90  | 493  | 46.9 | 51.43 | 1.44 |  |
| ATHORIS                     | 5.494                        | 2.579 | 0.339 | 2.284             | 6.333 | 4.530 | 0.698 | 3.883             | 5.234 | 4.261 | 0.841 | 3.962             | 130 | 137 | 175 | 38  | 8046  | 77  | 529  | 39.0 | 51.50 | 1.36 |  |
| BURGOS                      | 5.375                        | 2.645 | 0.411 | 2.745             | 6.378 | 4.677 | 0.802 | 4.565             | 5.603 | 4.875 | 0.941 | 3.927             | 136 | 143 | 177 | 35  | 7539  | 88  | 556  | 32.8 | 57.97 | 1.67 |  |
| CALERO                      | 5.238                        | 2.398 | 0.339 | 1.986             | 6.426 | 4.440 | 0.624 | 3.729             | 5.820 | 4.468 | 0.709 | 2.915             | 133 | 140 | 180 | 40  | 7578  | 80  | 498  | 53.9 | 44.87 | 1.11 |  |
| CARPIO                      | 5.096                        | 2.421 | 0.384 | 2.077             | 6.452 | 4.478 | 0.744 | 3.954             | 5.329 | 4.509 | 0.958 | 3.008             | 130 | 137 | 177 | 39  | 7749  | 88  | 542  | 41.0 | 52.73 | 1.34 |  |
| CLAUDIO                     | 5.533                        | 2.630 | 0.375 | 2.500             | 6.720 | 4.624 | 0.754 | 4.406             | 6.003 | 5.005 | 0.863 | 3.376             | 133 | 140 | 178 | 38  | 8469  | 95  | 600  | 35.3 | 51.60 | 1.36 |  |
| DON_RICARDO                 | 5.299                        | 2.605 | 0.459 | 2.514             | 6.254 | 4.387 | 0.839 | 4.117             | 5.294 | 4.401 | 0.928 | 3.836             | 131 | 138 | 174 | 37  | 7512  | 85  | 387  | 33.0 | 59.37 | 1.62 |  |
| DON_SEBASTIAN               | 5.462                        | 2.661 | 0.426 | 2.793             | 6.505 | 4.578 | 0.844 | 4.497             | 5.686 | 4.834 | 0.946 | 4.116             | 131 | 138 | 177 | 39  | 5910  | 95  | 569  | 23.6 | 61.30 | 1.59 |  |
| EUNOBLE                     | 5.573                        | 2.583 | 0.380 | 2.492             | 6.451 | 4.392 | 0.781 | 3.994             | 5.208 | 3.928 | 0.883 | 2.866             | 128 | 135 | 175 | 40  | 6478  | 83  | 591  | 29.4 | 50.87 | 1.28 |  |
| EURODURO                    | 5.482                        | 2.642 | 0.357 | 2.490             | 6.337 | 4.425 | 0.734 | 3.883             | 5.431 | 4.302 | 0.915 | 2.660             | 133 | 139 | 176 | 37  | 7844  | 88  | 498  | 30.1 | 54.83 | 1.50 |  |
| GRADOR                      | 5.341                        | 2.478 | 0.377 | 2.354             | 6.456 | 4.358 | 0.735 | 3.501             | 5.397 | 3.996 | 0.776 | 2.064             | 130 | 137 | 175 | 38  | 7754  | 90  | 564  | 36.1 | 61.23 | 1.61 |  |
| IBERUS                      | 5.533                        | 2.603 | 0.413 | 2.405             | 6.521 | 4.643 | 0.761 | 4.241             | 6.177 | 4.948 | 0.899 | 4.151             | 134 | 141 | 178 | 37  | 7615  | 82  | 627  | 31.9 | 48.60 | 1.30 |  |
| SCULPTUR                    | 5.614                        | 2.697 | 0.392 | 2.426             | 6.615 | 4.508 | 0.736 | 4.313             | 5.966 | 5.252 | 0.827 | 3.816             | 131 | 139 | 178 | 39  | 8268  | 85  | 440  | 41.7 | 48.10 | 1.22 |  |
| TUSSUR                      | 5.164                        | 2.507 | 0.362 | 2.417             | 6.283 | 4.358 | 0.718 | 4.149             | 5.344 | 4.183 | 0.778 | 3.749             | 130 | 137 | 177 | 40  | 6641  | 73  | 458  | 38.8 | 54.30 | 1.35 |  |
| Rainfed                     |                              |       |       |                   |       |       |       |                   |       |       |       |                   |     |     |     |     |       |     |      |      |       |      |  |
| 05D278D1be                  | 5.622                        | 2.605 | 0.409 | 1.591             | 4.638 | 3.518 | 0.320 | 1.927             | 3.649 | 1.806 | 0.707 | 0.756             | 125 | 134 | 167 | 34  | 4001  | 85  | 404  | 30.1 | 48.80 | 1.45 |  |
| 07D057D4fba                 | 5.618                        | 2.687 | 0.325 | 2.353             | 4.758 | 3.679 | 0.394 | 2.617             | 3.698 | 1.852 | 0.392 | 0.823             | 130 | 137 | 174 | 37  | 4848  | 82  | 489  | 26.1 | 54.33 | 1.48 |  |
| 08D010D10cab                | 5.803                        | 2.634 | 0.475 | 1.250             | 4.982 | 4.017 | 0.396 | 2.301             | 4.033 | 2.336 | 0.705 | 1.176             | 130 | 136 | 171 | 35  | 4875  | 82  | 467  | 26.6 | 47.90 | 1.36 |  |
| 09D066D8cab                 | 5.878                        | 2.694 | 0.407 | 1.944             | 4.725 | 3.543 | 0.399 | 2.391             | 3.867 | 1.866 | 0.385 | 1.014             | 130 | 136 | 168 | 32  | 4363  | 82  | 476  | 27.1 | 52.33 | 1.64 |  |
| 09D069D1dcf                 | 5.708                        | 2.760 | 0.373 | 2.074             | 4.753 | 3.659 | 0.357 | 2.549             | 3.783 | 2.064 | 0.380 | 1.286             | 129 | 135 | 169 | 34  | 4617  | 78  | 564  | 25.6 | 51.17 | 1.50 |  |
| ANVERGUR                    | 5.172                        | 2.518 | 0.367 | 1.092             | 4.503 | 3.637 | 0.356 | 2.551             | 3.682 | 2.191 | 0.687 | 1.492             | 128 | 137 | 173 | 36  | 5194  | 78  | 413  | 38.8 | 49.80 | 1.38 |  |
| ATHORIS                     | 5.327                        | 2.659 | 0.419 | 1.197             | 4.514 | 3.506 | 0.345 | 2.142             | 3.717 | 1.977 | 0.645 | 1.171             | 126 | 134 | 169 | 35  | 5030  | 78  | 440  | 33.3 | 51.97 | 1.48 |  |
| BURGOS                      | 5.594                        | 2.588 | 0.573 | 1.160             | 4.742 | 3.574 | 0.490 | 2.330             | 3.913 | 2.165 | 0.525 | 1.500             | 129 | 137 | 169 | 33  | 5086  | 85  | 524  | 24.0 | 52.03 | 1.59 |  |
| CALERO                      | 5.120                        | 2.488 | 0.331 | 1.780             | 4.255 | 3.212 | 0.395 | 2.251             | 3.620 | 1.583 | 0.406 | 0.773             | 128 | 136 | 172 | 36  | 5126  | 75  | 391  | 35.4 | 45.13 | 1.24 |  |
| CARPIO                      | 5.510                        | 2.593 | 0.367 | 1.744             | 4.568 | 3.711 | 0.351 | 2.630             | 3.702 | 2.009 | 0.544 | 1.245             | 127 | 134 | 169 | 35  | 4292  | 83  | 404  | 31.9 | 49.17 | 1.39 |  |
| CLAUDIO                     | 5.745                        | 2.794 | 0.408 | 2.703             | 4.962 | 4.029 | 0.551 | 3.226             | 3.829 | 2.080 | 0.650 | 1.253             | 128 | 136 | 173 | 37  | 5395  | 83  | 476  | 29.8 | 51.60 | 1.41 |  |
| DON_RICARDO                 | 5.833                        | 2.635 | 0.464 | 1.365             | 4.691 | 3.694 | 0.671 | 2.481             | 3.821 | 2.382 | 0.750 | 1.677             | 127 | 134 | 169 | 35  | 5111  | 82  | 356  | 28.8 | 56.43 | 1.60 |  |
| DON_SEBASTIAN               | 5.975                        | 2.741 | 0.378 | 2.469             | 5.181 | 4.075 | 0.668 | 3.082             | 4.241 | 2.923 | 0.665 | 1.618             | 130 | 136 | 172 |     |       |     |      |      |       |      |  |
